# Supplementary material
Source: MDPI journal article supplement (https://www.mdpi.com/2225-1154/9/11/162)
Supplement: s1 [file s1]

**Table S1.** Radiocarbon dating results for samples collected in the upper parts of trough valleys within the Russian Altai and published after (Agatova et al., 2012).

| N | Lab code  | Location     |             |            |                                                                                      | N° E°                 | Altitude m a.s.l. | Sample type                                                | Tree specie    | <sup>14</sup> C Age | Calibrated age (2σ) | Interpretation                                   | Reference                |
|---|-----------|--------------|-------------|------------|--------------------------------------------------------------------------------------|-----------------------|-------------------|------------------------------------------------------------|----------------|---------------------|---------------------|--------------------------------------------------|--------------------------|
|   |           | Range        | Range slope | Exposition | Loc.                                                                                 |                       |                   |                                                            |                |                     |                     |                                                  |                          |
| 1 | LU-6452   | Mongun-Taiga | NE          | NE         | East Mugur valley                                                                    |                       | 2350              | Tree fragment                                              |                | 3370±70             | 3640±185            | Warm and humid climate                           | Ganushkin et al., 2017   |
| 2 | LU-6949   | Mongun-Taiga | NE          | NE         | East Mugur valley                                                                    |                       | 2640              | Tree fragment                                              |                | 8140±80             | 9090±310            | Warm and humid climate                           | Ganushkin et al., 2016   |
| 3 | SOAN-8116 | Mongun-Taiga | NE          | E          | East Mugur valley, floodplain in front of Aktru moraine of the East Mugur glacier    | N49°17'24" E89°10'55" | 2642              | Base part of tree trunk with bark fragments <i>in situ</i> | Pinus Sibirica | 8900±95             | 9960±270            | Trees grow within modern glacial zone            | Nazarov, Myglan 2012     |
| 4 | SOAN-8117 | Mongun-Taiga | NE          | E          | East Mugur valley, floodplain downstream the Aktru moraine of the East Mugur glacier | N49°17'54" E89°11'29" | 2575              | Base part of tree trunk with bark fragments <i>in situ</i> | Pinus Sibirica | 5285±55             | 6065±140            | Trees grow within modern glacial zone            | Nazarov, Myglan 2012     |
| 5 | IGAN 4089 | Chikhachev   | S           | W          | Upper Boguty valley                                                                  | N49°45'40" E89°27'57" | 2472              | Fragment of charcoal                                       | Larix Sibirica | 7640±100            | 8415±210            | Climate is favorable for growing tree vegetation | Nepop et al., 2020       |
| 6 | SOAN 2122 | Chikhachev   | S           | W          | Upper Boguty valley                                                                  |                       | 2480              | Fragment of charcoal                                       |                | 8510±40             | 9505±35             | Climate is favorable for growing tree vegetation | Rusanov and Orlova, 2013 |
| 7 | SOAN 2288 | Chikhachev   | S           | W          | Upper Boguty valley                                                                  |                       | 2480              | Fragment of charcoal                                       |                | 8730±90             | 9840±305            | Climate is favorable for growing tree vegetation | Rusanov and Orlova, 2013 |
| 8 | SOAN 2289 | Chikhachev   | S           | W          | Upper Boguty valley                                                                  |                       | 2480              | Fragment of charcoal                                       |                | 8330±95             | 9280±240            | Climate is favorable for growing tree vegetation | Rusanov and Orlova, 2013 |
| 9 | SOAN 2290 | Chikhachev   | S           | W          | Upper Boguty valley                                                                  |                       | 2480              | Fragment of charcoal                                       |                | 8890±70             | 9970±235            | Climate is favorable for growing tree vegetation | Rusanov and Orlova, 2013 |

|    |             |             |   |   |                                             |                          |      |                                           |                |          |          |                                                  |                      |
|----|-------------|-------------|---|---|---------------------------------------------|--------------------------|------|-------------------------------------------|----------------|----------|----------|--------------------------------------------------|----------------------|
| 10 | SOAN 8674   | Chikhachev  | S | W | Upper Boguty valley                         | N49°45'40"<br>E89°27'57" | 2472 | Fragment of charcoal                      | Larix Sibirica | 7780±75  | 8630±225 | Climate is favorable for growing tree vegetation | Nepop et al., 2020   |
| 11 | SOAN 9366-2 | Chikhachev  | S | W | Upper Boguty valley                         | N49°45'40"<br>E89°27'57" | 2472 | Fragment of charcoal                      | Larix Sibirica | 7470±150 | 8265±280 | Climate is favorable for growing tree vegetation | Nepop et al., 2020   |
| 12 | IGAN 3694   | South-Chuya | N | E | Akkol valley, forefield of Sofiisky glacier | N49°48'29"<br>E87°49'20" | 2476 | Tree fragment washed out from the glacier | Pinus Sibirica | 4050±80  | 4590±235 | Trees grow within modern glacial zone            | Nazarov, Myglan 2012 |
| 13 | IGAN 3695   | South-Chuya | N | E | Akkol valley, forefield of Sofiisky glacier | N49°48'29"<br>E87°49'18" | 2466 | Tree fragment washed out from the glacier | Pinus Sibirica | 3550±110 | 3860±290 | Trees grow within modern glacial zone            | Nazarov, Myglan 2012 |
| 14 | IGAN 3882   | South-Chuya | N | E | Akkol valley, forefield of Sofiisky glacier | N49°48'40"<br>E7°50'13"  | 2458 | Tree fragment washed out from the glacier | Pinus Sibirica | 3040±70  | 3200±190 | Trees grow within modern glacial zone            | Nazarov, Myglan 2012 |
| 15 | IGAN 3887   | South-Chuya | N | E | Akkol valley, forefield of Sofiisky glacier | N49°48'29"<br>E87°49'20" | 2476 | Tree fragment washed out from the glacier | Pinus Sibirica | 3020±70  | 3190±185 | Trees grow within modern glacial zone            | Nazarov, Myglan 2012 |
| 16 | SOAN 6915   | South-Chuya | N | E | Akkol valley, forefield of Sofiisky glacier | N49°49'33"<br>E87°49'20" | 2451 | Tree fragment washed out from the glacier | Pinus Sibirica | 3525±70  | 3800±185 | Trees grow within modern glacial zone            | Nazarov, Myglan 2012 |
| 17 | SOAN 6916   | South-Chuya | N | E | Akkol valley, forefield of Sofiisky glacier | N49°48'28"<br>E87°49'11" | 2459 | Tree fragment washed out from the glacier | Pinus Sibirica | 3365±95  | 3615±220 | Trees grow within modern glacial zone            | Nazarov, Myglan 2012 |
| 18 | SOAN 7383   | South-Chuya | N | E | Akkol valley, forefield of Sofiisky glacier | N49°48'28"<br>E87°49'13" | 2480 | Tree fragment washed out from the glacier | Pinus Sibirica | 4270±110 | 4865±410 | Trees grow within modern glacial zone            | Nazarov, Myglan 2012 |

|    |               |                 |    |   |                                                    |                          |      |                                                       |                   |          |          |                                             |                            |
|----|---------------|-----------------|----|---|----------------------------------------------------|--------------------------|------|-------------------------------------------------------|-------------------|----------|----------|---------------------------------------------|----------------------------|
| 19 | IGAN<br>3875  | North-<br>Chuya | NE | E | Maashey valley,<br>forefield of Maashey<br>glacier | N50°07'46"<br>E87°35'32" | 2157 | Tree<br>fragment<br>washed out<br>from the<br>glacier | Pinus<br>Sibirica | 4870±70  | 5590±255 | Trees grow<br>within modern<br>glacial zone | Nazarov,<br>Myglan<br>2012 |
| 20 | IGAN<br>3880  | North-<br>Chuya | NE | E | Maashey valley,<br>forefield of Maashey<br>glacier | N50°06'29"<br>E87°36'46" | 2174 | Tree<br>fragment<br>washed out<br>from the<br>glacier | Pinus<br>Sibirica | 4540±80  | 5175±285 | Trees grow<br>within modern<br>glacial zone | Nazarov,<br>Myglan<br>2012 |
| 21 | SOAN-<br>6467 | North-<br>Chuya | NE | E | Maashey valley,<br>forefield of Maashey<br>glacier | N50°06'32"<br>E87°35'45" | 2176 | Tree<br>fragment<br>washed out<br>from the<br>glacier | Pinus<br>Sibirica | 5230±55  | 6045±140 | Trees grow<br>within modern<br>glacial zone | Nazarov,<br>Myglan<br>2012 |
| 22 | SOAN-<br>6468 | North-<br>Chuya | NE | E | Maashey valley,<br>forefield of Maashey<br>glacier | N50°06'44"<br>E87°35'37" | 2158 | Tree<br>fragment<br>washed out<br>from the<br>glacier | Pinus<br>Sibirica | 4890±50  | 5610±125 | Trees grow<br>within modern<br>glacial zone | Nazarov,<br>Myglan<br>2012 |
| 23 | SOAN-<br>7376 | North-<br>Chuya | NE | E | Maashey valley,<br>forefield of Maashey<br>glacier | N50°07'46"<br>E87°35'33" | 2145 | Tree<br>fragment<br>washed out<br>from the<br>glacier | Pinus<br>Sibirica | 4985±95  | 5705±215 | Trees grow<br>within modern<br>glacial zone | Nazarov,<br>Myglan<br>2012 |
| 24 | SOAN-<br>7377 | North-<br>Chuya | NE | E | Maashey valley,<br>forefield of Maashey<br>glacier | N50°06'40"<br>E87°35'42" | 2158 | Tree<br>fragment<br>washed out<br>from the<br>glacier | Pinus<br>Sibirica | 4680±90  | 5330±270 | Trees grow<br>within modern<br>glacial zone | Nazarov,<br>Myglan<br>2012 |
| 25 | SOAN-<br>7378 | North-<br>Chuya | NE | E | Maashey valley,<br>forefield of Maashey<br>glacier | N50°06'34"<br>E87°35'46" | 2173 | Tree<br>fragment<br>washed out<br>from the<br>glacier | Pinus<br>Sibirica | 4710±100 | 5360±295 | Trees grow<br>within modern<br>glacial zone | Nazarov,<br>Myglan<br>2012 |
| 26 | IGAN<br>3876  | Katun           | N  | E | Mensu valley, forefield<br>of Mensu glacier        | N49°51'58"<br>E86°43'11" | 1993 | Tree<br>fragment<br>washed out<br>from the<br>glacier | Pinus<br>Sibirica | 2540±70  | 2570±190 | Trees grow<br>within modern<br>glacial zone | Nazarov,<br>Myglan<br>2012 |
| 27 | IGAN<br>3877  | Katun           | N  | E | Mensu valley, forefield<br>of Mensu glacier        | N49°51'22"<br>E86°42'27" | 2147 | Tree<br>fragment<br>washed out                        | Pinus<br>Sibirica | 4520±60  | 5205±230 | Trees grow<br>within modern<br>glacial zone | Nazarov,<br>Myglan<br>2012 |

|    |           |       |   |   |                                          |                          |      |                                                           |                |         |          |                                       |                       |
|----|-----------|-------|---|---|------------------------------------------|--------------------------|------|-----------------------------------------------------------|----------------|---------|----------|---------------------------------------|-----------------------|
|    |           |       |   |   |                                          |                          |      | from the glacier                                          |                |         |          |                                       |                       |
| 28 | IGAN 3883 | Katun | N | E | Mensu valley, forefield of Mensu glacier | N49°48'28"<br>E86°49'13" | 1993 | Tree fragment washed out from the glacier                 | Pinus Sibirica | 1440±70 | 1395±130 | Trees grow within modern glacial zone | Nazarov, Myglan 2012  |
| 29 | IGAN 3884 | Katun | N | E | Mensu valley, forefield of Mensu glacier | N49°51'58"<br>E86°43'11" | 1993 | Tree fragment washed out from the glacier                 | Pinus Sibirica | 2310±70 | 2410±280 | Trees grow within modern glacial zone | Nazarov, Myglan 2012  |
| 30 | SOAN 6917 | Katun | N | E | Akkem valley, forefield of Akkem glacier | N49°53'01"<br>E86°32'55" | 2106 | Tree fragment on the valley slope near the modern glacier | Pinus Sibirica | 400±40  | 420±100  | Tree killed by climate deterioration  | Galakhov et al., 2012 |
| 31 | SOAN 6918 | Katun | N | E | Akkem valley, forefield of Akkem glacier | N49°53'04"<br>E86°32'55" | 2114 | Tree fragment on the glacier forefield                    | Larix Sibirica | 1400±70 | 1350±170 | Tree killed by climate deterioration  | Galakhov et al., 2012 |
| 32 | SOAN 6919 | Katun | N | E | Akkem valley, forefield of Akkem glacier | N49°52'37"<br>E86°33'05" | 2113 | Tree fragment on the glacier forefield                    | Larix Sibirica | 3600±85 | 3900±250 | Tree killed by climate deterioration  | Galakhov et al., 2012 |
| 33 | SOAN 6920 | Katun | N | E | Akkem valley, forefield of Akkem glacier | N49°52'30"<br>E86°33'04" | 2109 | Tree fragment on the glacier forefield                    | Larix Sibirica | 2895±35 | 3045±115 | Tree killed by climate deterioration  | Galakhov et al., 2012 |
| 34 | SOAN 6921 | Katun | N | E | Akkem valley, forefield of Akkem glacier | N49°52'25"<br>E86°33'04" | 2124 | Tree fragment on the glacier forefield                    | Larix Sibirica | 3140±30 | 3350±95  | Tree killed by climate deterioration  | Galakhov et al., 2012 |
| 35 | SOAN 6922 | Katun | N | E | Akkem valley, forefield of Akkem glacier | N49°53'03"<br>E86°33'05" | 2114 | Tree fragment on the glacier forefield                    | Larix Sibirica | 2970±45 | 3160±165 | Tree killed by climate deterioration  | Galakhov et al., 2012 |
| 36 | SOAN 6923 | Katun | N | E | Akkem valley, forefield of Akkem glacier | N49°52'41"<br>E86°33'09" | 2100 | Tree fragment on the glacier forefield                    | Larix Sibirica | 3835±45 | 4255±155 | Tree killed by climate deterioration  | Galakhov et al., 2012 |

|    |           |       |   |           |                                          |                          |      |                                                                   |                |         |          |                                                  |                       |
|----|-----------|-------|---|-----------|------------------------------------------|--------------------------|------|-------------------------------------------------------------------|----------------|---------|----------|--------------------------------------------------|-----------------------|
| 37 | SOAN 6925 | Katun | N | E         | Mensu valley, forefield of Mensu glacier | N49°51'32"<br>E86°42'30" | 2149 | Tree fragment washed out from glacier                             | Pinus Sibirica | 5595±85 | 6420±205 | Trees grow within modern glacial zone            | Nazarov, Myglan 2012  |
| 38 | SOAN 6926 | Katun | N | E         | Mensu valley, forefield of Mensu glacier | N49°51'32"<br>E86°42'35" | 2137 | Tree fragment washed out from glacier                             | Pinus Sibirica | 5545±85 | 6335±200 | Trees grow within modern glacial zone            | Nazarov, Myglan 2012  |
| 39 | SOAN 6927 | Katun | N | E         | Mensu valley, forefield of Mensu glacier | N49°51'35"<br>E86°42'31" | 2137 | Tree fragment washed out from glacier                             | Pinus Sibirica | 5315±75 | 6105±170 | Trees grow within modern glacial zone            | Nazarov, Myglan 2012  |
| 40 | SOAN 6930 | Katun | N | E         | Mensu valley, forefield of Mensu glacier | N49°51'35"<br>E86°43'17" | 1970 | Tree fragment washed out from glacier                             | Pinus Sibirica | 5395±75 | 6135±180 | Trees grow within modern glacial zone            | Nazarov, Myglan 2012  |
| 41 | SOAN 6931 | Katun | N | E         | Mensu valley, forefield of Mensu glacier | N49°52'01"<br>E86°43'12" | 1970 | Tree fragment washed out from glacier                             | Pinus Sibirica | 2490±75 | 2550±185 | Trees grow within modern glacial zone            | Nazarov, Myglan 2012  |
| 42 | SOAN 7386 | Katun | N | E         | Mensu valley, forefield of Mensu glacier | N49°52'05"<br>E86°43'16" | 1986 | Tree fragment washed out from glacier                             | Pinus Sibirica | 4610±80 | 5310±270 | Trees grow within modern glacial zone            | Nazarov, Myglan 2012  |
| 43 | SOAN-9440 | Katun | N | N         | Jarlu valley                             | N49°55'06"<br>E86°33'27" | 2077 | Fragment of paleotree in situ                                     | Larix Sibirica | 190±50  | 185±125  | Warm and humid climate                           | Galakhov et al., 2018 |
| 44 | SOAN-9590 | Katun | N | watershed | watershed Jarlu-Tekelu                   | N49°55'17"<br>E86°36'42" | 2702 | Fragment of paleotree trunk with a base part, buried by landslide | Larix Sibirica | 8040±90 | 8925±315 | Climate is favorable for growing tree vegetation | Galakhov et al., 2018 |
| 45 | SOAN-9591 | Katun | N | watershed | watershed Jarlu-Tekelu                   | N49° E86°                | 2702 | Fragment of paleotree trunk with a base part, buried by landslide | Larix Sibirica | 8285±85 | 9250±220 | Climate is favorable for growing tree vegetation | Galakhov et al., 2018 |
| 46 | SOAN-9592 | Katun | N | watershed | watershed Jarlu-Tekelu                   | N49°55'13"<br>E86°36'42" | 2687 | Fragment of paleotree trunk with a base part,                     | Larix Sibirica | 6170±80 | 7035±225 | Climate is favorable for growing tree vegetation | Galakhov et al., 2018 |

|    |           |       |   |           |                        |                          |      |                                                                   |                |          |           |                                                  |                       |
|----|-----------|-------|---|-----------|------------------------|--------------------------|------|-------------------------------------------------------------------|----------------|----------|-----------|--------------------------------------------------|-----------------------|
|    |           |       |   |           |                        |                          |      | buried by landslide                                               |                |          |           |                                                  |                       |
| 47 | SOAN-9593 | Katun | N | watershed | watershed Jarlu-Tekelu | N49°55'13"<br>E86°36'41" | 2671 | Fragment of paleotree trunk with a base part, buried by landslide | Larix Sibirica | 8310±90  | 9065±335  | Climate is favorable for growing tree vegetation | Galakhov et al., 2018 |
| 48 | SOAN-9615 | Katun | N | watershed | watershed Jarlu-Tekelu | N49°55'25"<br>E86°36'37" | 2720 | Fragment of tree roots                                            | Larix Sibirica | 4480±80  | 5095±220  | Climate is favorable for growing tree vegetation | Galakhov et al., 2018 |
| 49 | SOAN-9617 | Katun | N | watershed | watershed Jarlu-Tekelu | N49°55'25"<br>E86°36'37" | 2720 | Fragment of tree roots                                            | Larix Sibirica | 4835±70  | 5525±195  | Climate is favorable for growing tree vegetation | Galakhov et al., 2018 |
| 50 | SOAN-9618 | Katun | N | watershed | watershed Jarlu-Tekelu | N49°55'13"<br>E86°36'42" | 2687 | Fragment of paleotree trunk with a base part, buried by landslide | Larix Sibirica | 5780±60  | 6585±140  | Climate is favorable for growing tree vegetation | Galakhov et al., 2018 |
| 51 | SOAN-9637 | Katun | N | watershed | watershed Jarlu-Tekelu | N49°55'13"<br>E86°36'42" | 2687 | Fragment of tree roots in situ                                    | Larix Sibirica | 3870±100 | 4275±295  | Climate is favorable for growing tree vegetation | Galakhov et al., 2018 |
| 52 | SOAN-9638 | Katun | N | watershed | watershed Jarlu-Tekelu | N49°55'27"<br>E86°36'44" | 2700 | Fragment of paleotree trunk                                       | Larix Sibirica | 7880±125 | 8720±295  | Climate is favorable for growing tree vegetation | Galakhov et al., 2018 |
| 53 | SOAN-9639 | Katun | N | watershed | watershed Jarlu-Tekelu | N49°55'27"<br>E86°36'44" | 2700 | Fragment of paleotree trunk in moraine                            | Larix Sibirica | 9905±125 | 11425±525 | Climate is favorable for growing tree vegetation | Galakhov et al., 2018 |
| 54 | SOAN-9640 | Katun | N | watershed | watershed Jarlu-Tekelu | N49°55'25"<br>E86°36'37" | 2720 | Fragment of tree roots                                            | Larix Sibirica | 4250±120 | 4860±420  | Climate is favorable for growing tree vegetation | Galakhov et al., 2018 |
| 55 | SOAN-9641 | Katun | N | watershed | watershed Jarlu-Tekelu | N49°55'13"<br>E86°36'42" | 2687 | Fragment of tree roots in situ                                    | Larix Sibirica | 5930±100 | 6750±255  | Climate is favorable for growing tree vegetation | Galakhov et al., 2018 |
